# Supplementary material for: Multi-functionality of rhodium-loaded MOR zeolite: production of H2via the water gas shift reaction and its use in the formation of NH3
Source: Royal Society of Chemistry journal article supplement (doi:10.1039/d3cy00043e), 2023-01-01
Supplement: d3cy00043e1.pdf [file d3cy00043e1.pdf]

# Multi-functionality of rhodium-loaded MOR zeolite: Production of H<sub>2</sub> via the water gas shift reaction and its use in the formation of NH<sub>3</sub>

*Shunsaku Yasumura,<sup>†</sup> Ken Nagai,<sup>†</sup> Yucheng Qian,<sup>†</sup> Takashi Toyao,<sup>†</sup> Zen Maeno,<sup>‡</sup> Ken-ichi Shimizu<sup>\*†</sup>*

<sup>†</sup> Institute for Catalysis, Hokkaido University, N-21, W-10, Sapporo 001-0021, Japan.

<sup>‡</sup> School of Advanced Engineering, Kogakuin University, 2665-1 Nakano-cho, Hachioji, Tokyo 192-0015, Japan.

## Sample preparation

The  $\text{NH}_4^+$ -form of MOR zeolite with a Si/Al ratio of 10, denoted as  $\text{NH}_4\text{-MOR}$ , was supplied by Catalysis Society of Japan (JRC-Z-M20). Rh(0.6 wt%)-exchanged MOR (RhMOR) was prepared by ion-exchange of  $\text{NH}_4^+$ -MOR (Si/Al = 10) with 0.002 M aqueous solution of  $\text{RhCl}_3$  at 80 °C, followed by filtering, washing with distilled water (200  $\text{cm}^3$ ) three times, drying at 100 °C for 20 h, and by calcination in the air at 500 °C for 0.5 h. Rh loadings were determined by X-ray fluorescence spectroscopy (Shimadzu, EDX-700HS).

## IR measurement

*In situ* IR measurements were carried out within transmission mode using a JASCO FT/IR-4200 spectrometer equipped with a triglycine sulfate (TGS) detector. A homemade *in situ* IR cell, set in the IR spectrometer, was connected to a conventional flow reaction system (total flow: 100  $\text{mL min}^{-1}$ ). The He flow passed through the bubbler (cooled at 0 °C) to feed  $\text{H}_2\text{O}$  into the gas mixture. The sample disk was obtained by pelletizing into a 40 mg self-supported disk and placed in the *in situ* IR cell (made by pyrex) with  $\text{CaF}_2$  windows. IR spectra were recorded by accumulating 20 scans at a resolution of 4  $\text{cm}^{-1}$ . The reference spectrum of the sample disk was collected under a He flow at the measuring temperature (200 °C). The gas line from the IR cell was directly connected to a homemade gas cell equipped with KBr windows to monitor the outlet gases ( $\text{NO}$ ,  $\text{N}_2\text{O}$ ,  $\text{CO}$ ,  $\text{CO}_2$ , and  $\text{NH}_3$ ) using a JASCO FT/IR-4600 spectrometer (equipped with a TGS detector). To monitor the outlet  $\text{H}_2$ , a mass spectrometry (BELMass, MicrotracBEL Corp.) was connected the downstream of the IR gas cell. The schematic view of the used setup is shown in **Figure S1**

## Computational details

Spin-polarized density functional theory (DFT) calculations were performed using the Vienna *Ab initio* Simulation Package (VASP)<sup>1,2</sup>. In particular, the projected augmented wave (PAW) method<sup>3,4</sup> was employed for the Kohn–Sham equations<sup>5,6</sup> with a plane-wave energy cutoff of 400 eV. The generalized gradient approximated Perdew–Burke–Ernzerhof (GGA-PBE) functional<sup>7</sup> was employed to describe the electron exchange-correlation. The Brillouin zone sampling was restricted to the  $\Gamma$  point.<sup>8</sup> Van der Waals interactions were considered using the dispersion-corrected DFT-D3 (BJ) method<sup>9,10</sup>. The periodic model of the MOR

zeolite, utilized as the model zeolite for reducing computational cost for the reaction mapping, was obtained from the International Zeolite Association (IZA) database. The lattice constants of unit cell ( $a = 18.2560 \text{ \AA}$ ,  $b = 20.5340 \text{ \AA}$ ,  $c = 15.0840 \text{ \AA}$ , and  $\alpha = \beta = \gamma = 90.0^\circ$ ) were fixed during the calculations<sup>11</sup>. Among distinct T sites in the MOR framework, T4 site was applied as the Al replacement site.<sup>12,13</sup> A  $1 \times 1 \times 2$  of supercell was used in this study. Reaction route mapping was performed using the SC-AFIR method, as implemented in the GRRM17 program.<sup>14</sup> A model collision energy parameter of 1000 kJ/mol was used for all calculations. Only a positive force was applied to the SC-AFIR calculations. Reactants ( $\text{H}_2\text{O}$  and  $\text{CO}$  molecules) and a Rh atom of the initial structures were considered the target atoms of the SC-AFIR algorithm. During the calculations, the positions of the atoms in the zeolite framework were fixed at the initial positions. The locally updated plane (LUP) method was used to obtain the path top (PT) points, which were subsequently re-optimized by the following intrinsic reaction coordinate (IRC) calculation to determine the transition state (TS) structures and their connectivity.<sup>15</sup>

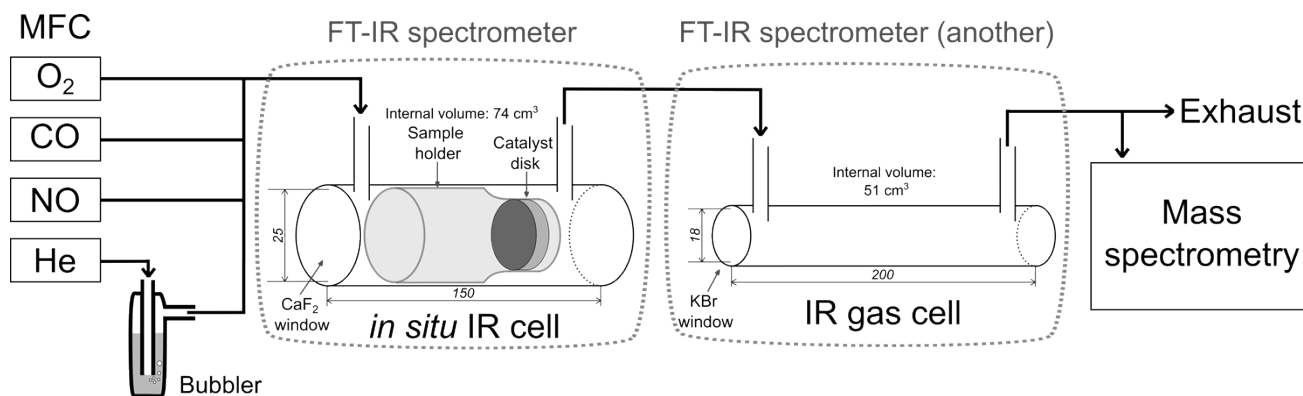

Figure S1 Schematic view of the used setup for *operando* IR measurement, including *in situ* IR cell, IR gas cell, and mass spectrometry. The inner diameter and length of the cell are provided with a unit of mm.

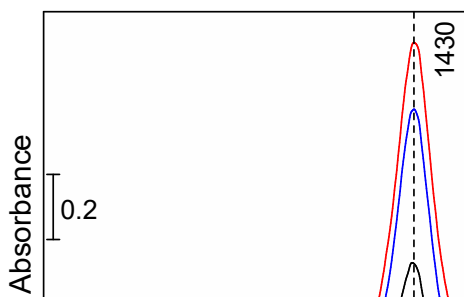

Figure S2 IR spectra during TPSR (20 °C min<sup>-1</sup>) under flowing 0.1% NO + 0.5% CO + 1% H<sub>2</sub>O over RhMOR (Figure 3).

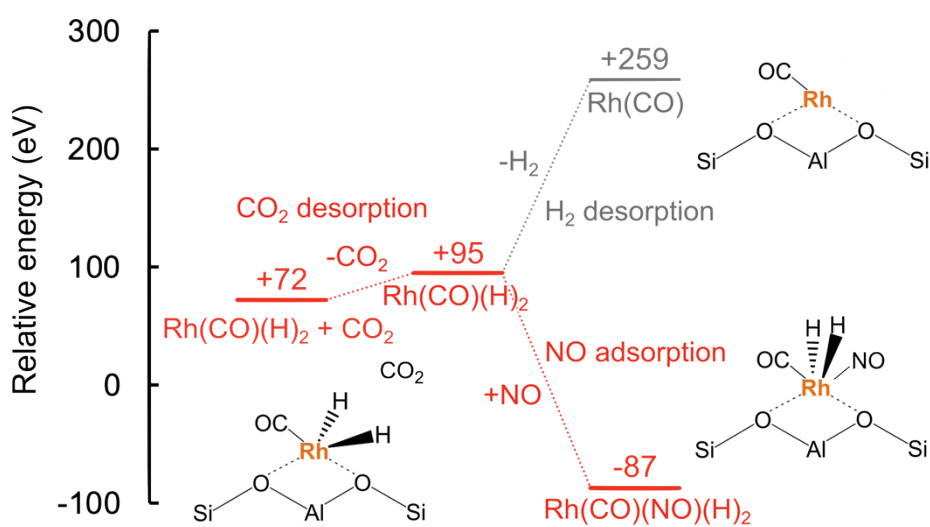

Figure S3 Energy profile for the reaction of Rh(CO)(H)<sub>2</sub>. The reaction path shown by red and gray lines is the NO adsorption and H<sub>2</sub> desorption pathway, respectively. Relative energies are provided under each bar. (Unit: kJ/mol)

## Reference

- 1 G. Kresse and J. Furthmüller, *Phys Rev B*, 1996, **54**, 11169–11186.
- 2 G. Kresse and J. Furthmüller, *Comput Mater Sci*, 1996, **6**, 15–50.
- 3 P. E. Blöchl, *Phys Rev B*, 1994, **50**, 17953–17979.
- 4 D. Kresse, G.; Joubert, G. Kresse and D. Joubert, *Phys Rev B*, 1999, **59**, 1758–1775.
- 5 P. Honnenberg and W. Kohn, *Phys Rev B*, 1964, **136**, B864–B871.
- 6 W. Kohn and L. J. Sham, *Phys Rev A (Coll Park)*, 1965, **140**, A1133–A1138.
- 7 J. P. Perdew, K. Burke and M. Ernzerhof, *Phys Rev Lett*, 1996, **77**, 3865–3868.
- 8 H. J. Monkhorst and J. D. Pack, *Phys Rev B*, 1976, **13**, 5188–5192.
- 9 S. Grimme, S. Ehrlich and L. Goerigk, *J Comput Chem*, 2011, **32**, 1456–1465.
- 10 S. Grimme, J. Antony, S. Ehrlich and H. Krieg, *J Chem Phys*, 2010, **132**, 154104.
- 11 Ch. Baerlocher and L. B. McCusker, Database of Zeolite Structures, <http://www.iza-structure.org/databases>, (accessed 10 June 2021).
- 12 M. Brändle and J. Sauer, *J Am Chem Soc*, 1998, **120**, 1556–1570.
- 13 H. Xia, *ACS Omega*, 2020, **5**, 9707–9713.
- 14 S. Maeda, Y. Harabuchi, M. Takagi, K. Saita, K. Suzuki, T. Ichino, Y. Sumiya, K. Sugiyama and Y. Ono, *J Comput Chem*, 2018, **39**, 233–250.
- 15 K. Fukui, *Acc Chem Res*, 1981, **14**, 363.
